# Supplementary material for: Controlling Persister and Biofilm Cells of Gram-Negative Bacteria with a New 1,3,5-Triazine Derivative
Source: MDPI journal article supplement (doi:10.3390/ph8040696), 2015-10-10
Supplement: s1 [file s1]

## Supplementary

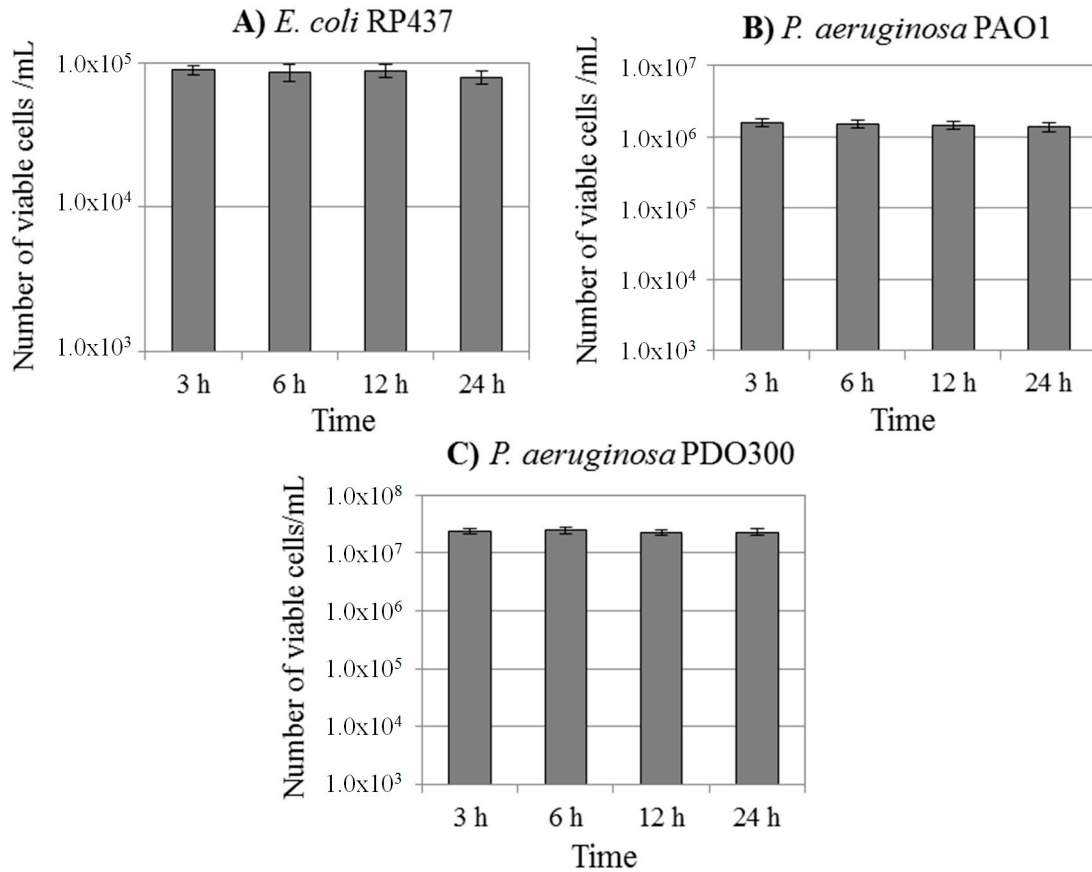

**Figure S1.** Extended treatment time did not increase the killing of planktonic cells of *E. coli* and *P. aeruginosa* by TN-5. Each sample was treated with 100  $\mu$ M TN-5 for 3, 6, 12, or 24 h. Three independent replicates were tested for each condition. *E. coli* RP437 (A), *P. aeruginosa* PAO1 (B), and *P. aeruginosa* PDO300 (C) were studied.

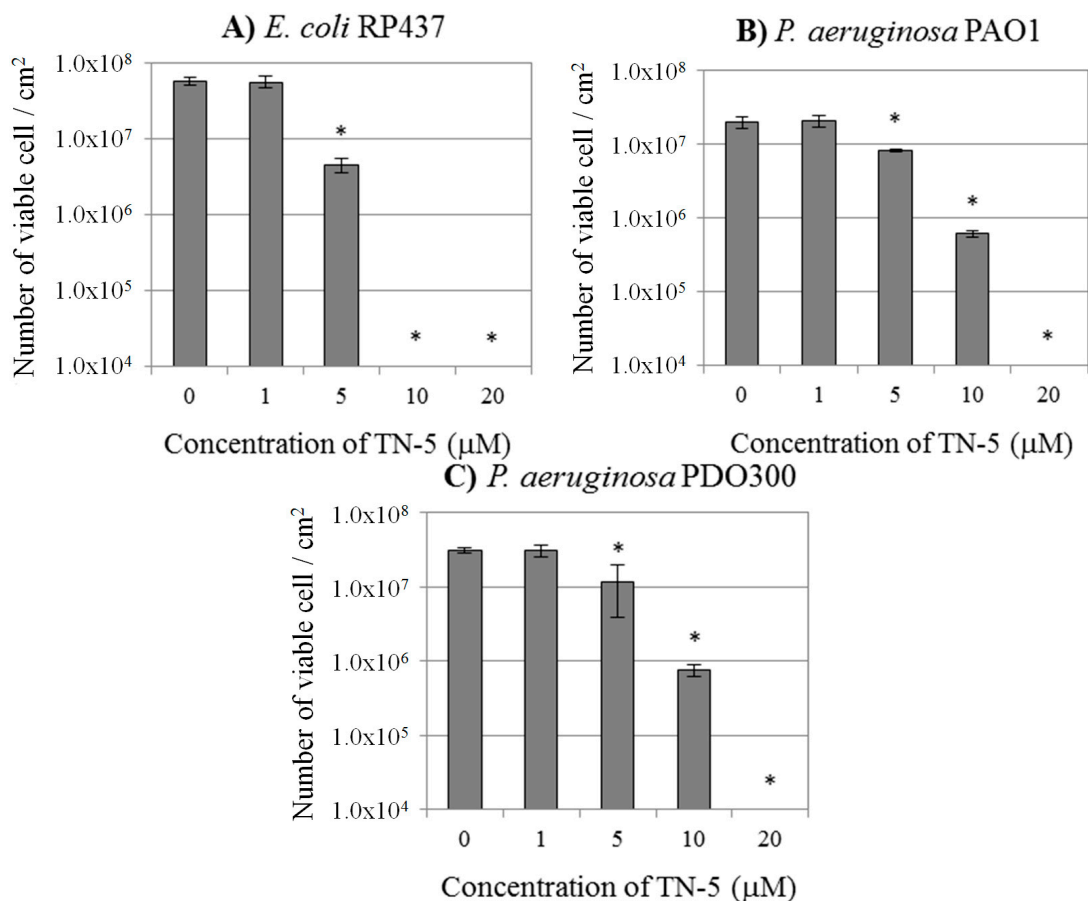

**Figure S2.** Effects of TN-5 on biofilm formation of *E. coli* RP437 (A), *P. aeruginosa* PAO1 (B), and *P. aeruginosa* PDO300 (C). Initial biofilm cultures were supplemented with TN-5 at different concentrations and incubated for 24 h at 37 °C. Then coupons were sonicated and vortexed to count CFU in biofilms. Three independent replicates were tested for each condition. All significant differences (compared with the TN-5 free control) with  $p < 0.01$  are marked with an asterisk.

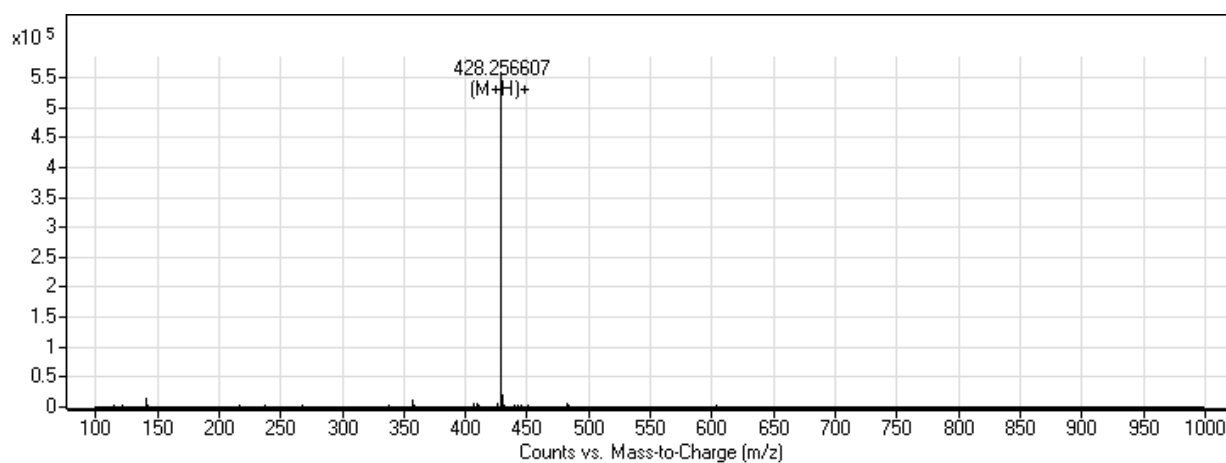

**Figure S3.** Mass spectrum of TN-5. The identity of TN-5 was confirmed by LC-MS (Agilent 6226 TOF LC/MS Mass Spectrometer). HRMS  $m/z$ : calculated  $[M + H]^+$  428.2557, found 428.2566,  $\Delta = 2.1$  ppm.

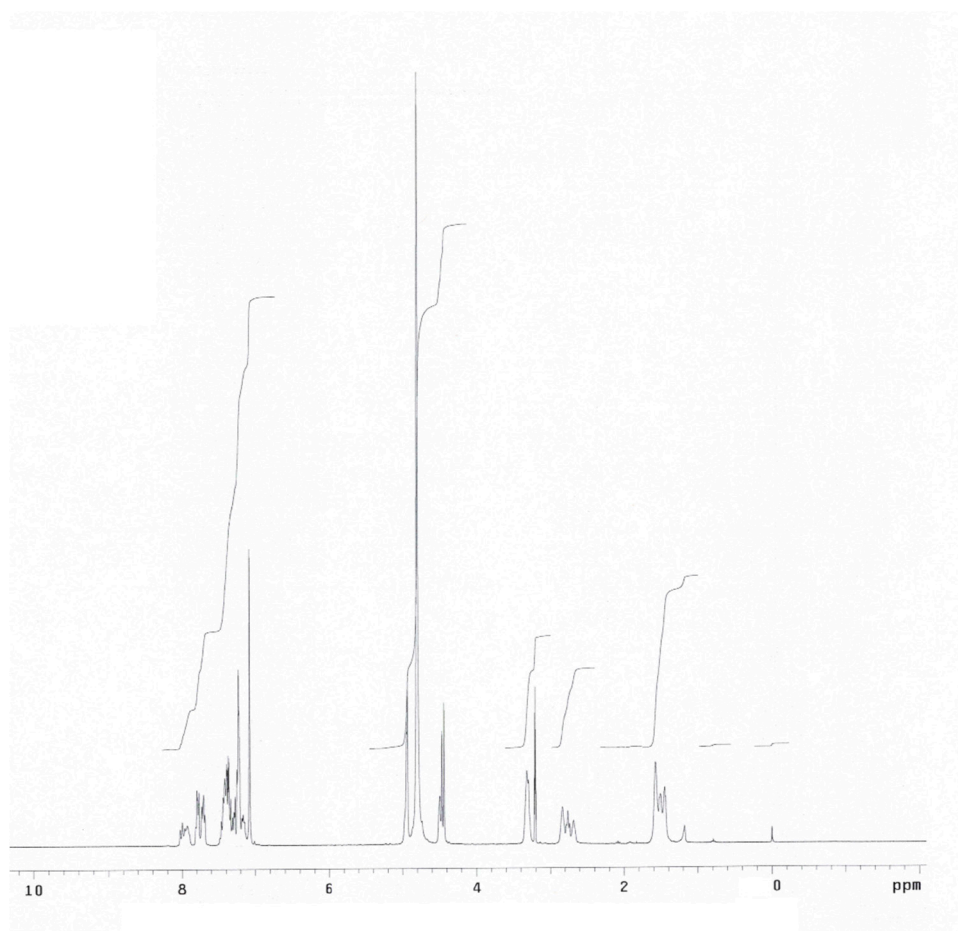

**Figure S4.**  $^1\text{H-NMR}$  of TN-5. TN-5 was characterized by  $^1\text{H-NMR}$  (Varian Mercury 300 MHz,  $\text{CD}_3\text{OD}$ ):  $\delta$  8.10–7.86 (m, 1H),  $\delta$  7.85–7.65 (m, 2H),  $\delta$  7.55–7.30 (m, 4H),  $\delta$  7.30–7.15 (m, 3H),  $\delta$  7.18 (s, 2H),  $\delta$  5.05–4.92 (m, 2H),  $\delta$  4.55–4.40 (m, 2H),  $\delta$  3.4–3.25 (m, 2H),  $\delta$  2.90–2.61 (m, 2H),  $\delta$  1.65–1.40 (m, 4H).

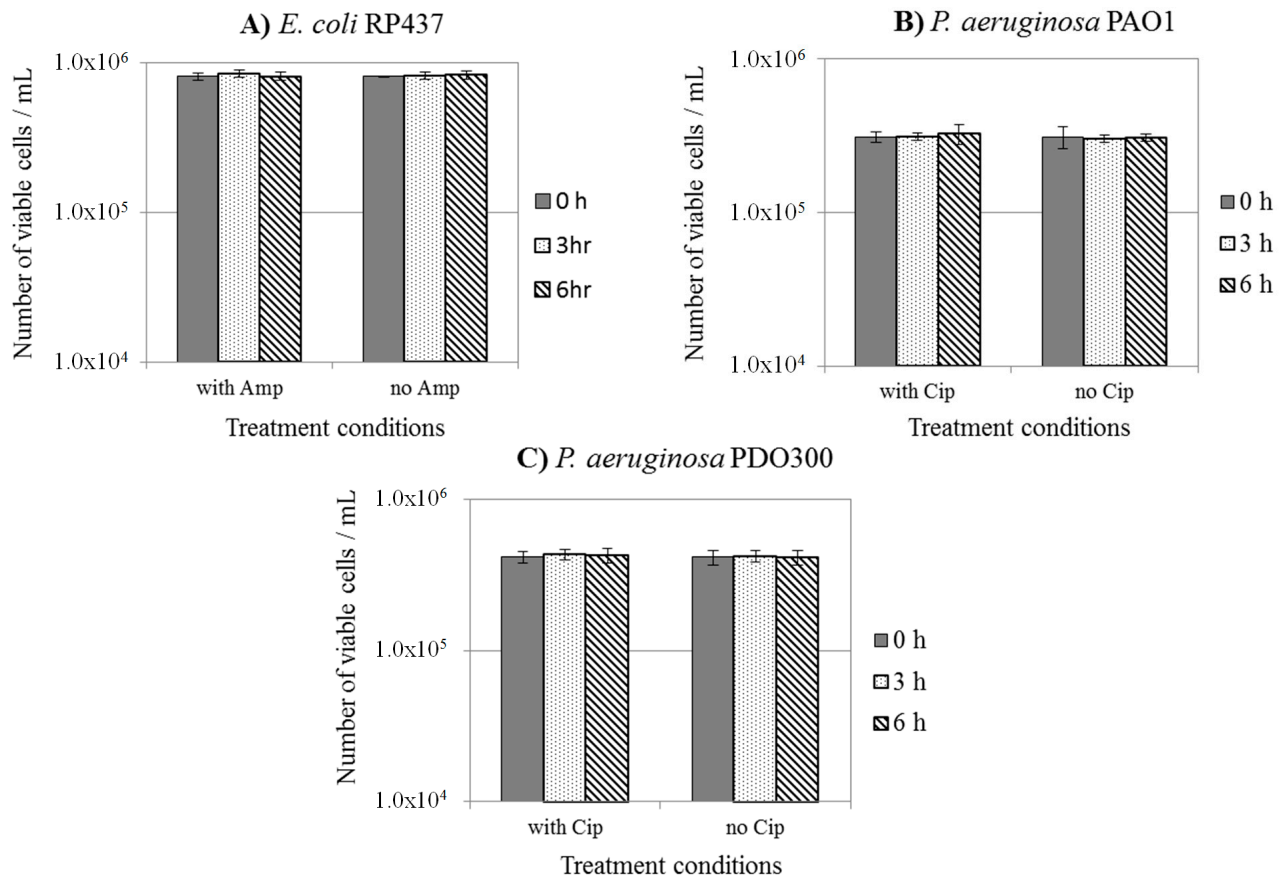

**Figure S5.** The isolated persister cells remained persistence after incubation in PBS. After isolation, the persister cells were incubated with or without antibiotic for 3 and 6 h. The persister cells of *E. coli* RP437 (A), *P. aeruginosa* PAO1 (B), and *P. aeruginosa* PDO300 (C) were studied. Ampicillin at 100  $\mu\text{g}/\text{mL}$  and ciprofloxacin at 200  $\mu\text{g}/\text{mL}$  were used to treat *E. coli* and *P. aeruginosa* persister cells, respectively.
